# Supplementary material for: Insecticidal Activity of Melaleuca alternifolia Essential Oil and RNA-Seq Analysis of Sitophilus zeamais Transcriptome in Response to Oil Fumigation
Source: PLoS One. 2016 Dec 9;11(12):e0167748. doi: 10.1371/journal.pone.0167748 (PMC5147960; doi:10.1371/journal.pone.0167748)
Supplement: S6 Table — (XLSX) [file pone.0167748.s006.xlsx]

## Sheet: S6 Table
S6 Table Differentially expressed genes in respiration- related enzymes
Min Liao1, Jin-Jing Xiao1, Li-Jun Zhou1, Yang Liu2, Xiang-Wei Wu1, 3, Ri-Mao Hua1, 3,Gui-Rong Wang2, Hai-Qun Cao1, 3*
# Classification	Gene ID	Protein identity	log2FC	Pvalue	FDR	Regulated
NADH dehydrogenase	CL38.Contig3_All	NADH dehydrogenase (ubiquinone) 1 beta subcomplex subunit 11	-1.79002	1.83626e-08	1.41454e-07	Down
	CL38.Contig1_All	NADH dehydrogenase [ubiquinone] 1 beta subcomplex subunit 11	-1.03925	1.27512e-12	1.4154e-11	Down
	Unigene11786_All	NADH dehydrogenase (ubiquinone) 1 alpha subcomplex subunit 6	-1.27055	7.68432e-05	0.000367429	Down
	CL3688.Contig1_All	NADH dehydrogenase (ubiquinone) 1 beta subcomplex subunit 1	-1.17763	5.82448e-06	3.3521e-05	Down
succinate dehydrogenase	CL857.Contig2_All	succinate dehydrogenase [ubiquinone] flavoprotein subunit, mitochondrial-like	3.44931	5.04928e-19	8.22293e-18	Up
	CL857.Contig4_All	succinate dehydrogenase [ubiquinone] flavoprotein subunit, mitochondrial-like	1.1481	6.23884e-12	6.54948e-11	Up
	CL857.Contig1_All	succinate dehydrogenase [ubiquinone] flavoprotein subunit, mitochondrial-like	-1.8785	3.37562e-08	2.53121e-07	Down
	CL857.Contig5_All	succinate dehydrogenase [ubiquinone] flavoprotein subunit, mitochondrial-like	-1.75126	4.14654e-24	8.58746e-23	Down
ubiquinol	Unigene3580_All	ubiquinol-cytochrome c reductase subunit 10	-1.28456	1.20428e-05	6.59428e-05	Down
cytochrome c oxidase	Unigene3336_All	cytochrome c oxidase subunit IV	-1.15215	1.48421e-22	2.86512e-21	Down
	Unigene11178_All	cytochrome c oxidase polypeptide IV	-1.12299	1.86366e-05	9.89184e-05	Down
	Unigene10246_All	cytochrome c oxidase subunit Va	-1.06095	1.82704e-14	2.30947e-13	Down
transporting ATPase	Unigene11467_All	transmembrane protein 64	1.80436	3.1956e-14	3.9779e-13	Up
	CL2338.Contig1_All	V-type H+-transporting ATPase subunit D	1.16019	1.34005e-06	8.3564e-06	Up
	Unigene22952_All	V-type H+-transporting ATPase 21kDa proteolipid subunit	-4.45396	3.65452e-06	2.1638e-05	Down
	Unigene20838_All	V-type H+-transporting ATPase 16kDa proteolipid subunit	-2.71289	2.45416e-07	1.67056e-06	Down
	Unigene21825_All	V-type H+-transporting ATPase subunit B	-4.36107	6.95236e-06	3.94703e-05	Down
	CL2538.Contig2_All	F-type H+-transporting ATPase subunit epsilon	-1.15316	1.09594e-09	9.43857e-09	Down
	Unigene1180_All	V-type H+-transporting ATPase subunit F	-1.22275	1.52308e-05	8.22563e-05	Down
Glycan biosynthesis and metabolism	CL1143.Contig2_All	telomerase reverse transcriptase	1.2437	3.28e-24	6.83e-23	Up
	CL1529.Contig1_All	beta-1,3-N-acetylglucosaminyltransferase 7	2.65059	6.22e-23	1.22e-21	Up
	CL1529.Contig2_All	beta-1,3-N-acetylglucosaminyltransferase 7	1.48802	4.87e-06	2.82e-05	Up
	CL1632.Contig2_All	fringe glycosyltransferase	-1.54405	1.05e-05	5.77e-05	Down
	CL1668.Contig2_All	polypeptide N-acetylgalactosaminyltransferase	1.89252	2.69e-05	0.000139451	Up
	CL2025.Contig2_All	phosphatidylinositol-glycan biosynthesis class F protein	1.44817	1.73e-06	1.06e-05	Up
	CL2171.Contig2_All	polypeptide N-acetylgalactosaminyltransferase 3	1.87072	8.27e-05	0.000393187	Up
	CL2246.Contig1_All	alpha-mannosidase	1.51338	0.000112756	0.000523308	Up
	CL2705.Contig1_All	polypeptide N-acetylgalactosaminyltransferase 5	2.05621	3.03e-07	2.04e-06	Up
	CL2705.Contig2_All	polypeptide N-acetylgalactosaminyltransferase 5	1.36591	3.09e-14	3.85e-13	Up
	CL2757.Contig3_All	beta-1,3-galactosyltransferase 1-like	-1.4371	3.62e-05	0.000183187	Down
	CL2816.Contig2_All	lactosylceramide 4-alpha-galactosyltransferase	-1.23184	4.59e-05	0.000229002	Down
	CL34.Contig1_All	protein O-GlcNAc transferase	1.22486	4.94e-10	4.4e-09	Up
	CL691.Contig2_All	nuclear pore complex protein Nup98-Nup96	1.0616	2.95e-05	0.000151964	Up
	CL691.Contig3_All	nuclear pore complex protein Nup98-Nup96	1.41255	4.55e-09	3.72e-08	Up
	CL865.Contig1_All	neutral alpha-glucosidase C-like	-1.60394	1.86e-159	3.54e-157	Down
	CL865.Contig2_All	neutral alpha-glucosidase C-like	-1.17649	0	0	Down
	CL974.Contig1_All	heparanase-like	8.2854	1.03e-11	1.06e-10	Up
	Unigene10061_All	lactosylceramide 4-alpha-galactosyltransferase	1.36923	1.53e-08	1.19e-07	Up
	Unigene10073_All	gene product from transcript CG33337-RB	2.50784	2.54e-57	1.38e-55	Up
	Unigene1013_All	beta-glucuronidase	1.09372	9.87e-34	3.02e-32	Up
	Unigene19014_All	collagen beta-1,O-galactosyltransferase	4.97072	1.16e-08	9.14e-08	Up
	Unigene21485_All	lysosomal alpha-mannosidase	-4.21675	2.5e-05	0.000130299	Down
	Unigene2493_All	hexosaminidase D	1.46566	1.31e-23	2.66e-22	Up
	Unigene2535_All	chondroitin sulfate synthase 2	1.10393	5.82e-18	8.96e-17	Up
	Unigene2855_All	glucuronyl/N-acetylglucosaminyl transferase EXT1	1.47288	2.09e-27	5.01e-26	Up
	Unigene3341_All	polypeptide N-acetylgalactosaminyltransferase 1	1.34601	1.75e-38	6.13e-37	Up
	Unigene4826_All	non-lysosomal glucosylceramidase	1.00182	4.05e-32	1.18e-30	Up
	Unigene5128_All	N-acetylgalactosaminyltransferase 7	1.30334	1.04e-05	5.74e-05	Up
	Unigene5320_All	glucosylceramidase-like	1.55639	8.09e-07	5.19e-06	Up
	Unigene5965_All	dolichyl-phosphate-mannose-protein mannosyltransferase	1.44218	8.43e-07	5.4e-06	Up
	Unigene6086_All	protein O-mannosyl-transferase 2	1.43888	0.000143949	0.000654244	Up
	Unigene6486_All	exostosin-2	1.29398	6.68e-30	1.8e-28	Up
	Unigene6669_All	gene product from transcript CG33337-RB	1.25343	9.23e-05	0.000435857	Up
	Unigene7562_All	alpha-mannosidase 2	1.22758	1.15e-20	2.03e-19	Up
	Unigene7700_All	mannosyl-oligosaccharide 1,2-alpha-mannosidase IA	2.07587	5.56e-28	1.38e-26	Up
	Unigene7799_All	CG33337 gene product from transcript CG33337-RB	1.25126	2.04e-09	1.71e-08	Up
	Unigene853_All	acetyl-coenzyme A transporter 1	1.04845	7.54e-10	6.59e-09	Up
	Unigene8939_All	beta-1,4-galactosyltransferase 2	1.79277	1.12e-25	2.48e-24	Up
	Unigene9712_All	neutral alpha-glucosidase AB-like	-1.7508	3.65e-65	2.3e-63	Down
TCA cycle	CL857.Contig2_All	succinate dehydrogenase [ubiquinone] flavoprotein subunit, mitochondrial-like	3.44931	5.05e-19	8.22e-18	Up
	Unigene14534_All	potassium voltage-gated channel Eag-related subfamily H member 8	2.83335	8.63e-06	4.83e-05	Up
	Unigene13133_All	eukaryotic translation initiation factor 2-alpha kinase 4-like	1.98806	0.000144765	0.000657219	Up
	CL987.Contig1_All	cleavage and polyadenylation specificity factor subunit 1	1.89984	1.58e-44	6.51e-43	Up
	CL1128.Contig1_All	cleavage and polyadenylation specificity factor subunit 1	1.88858	6.99e-11	6.7e-10	Up
	CL987.Contig2_All	malate dehydrogenase	1.47573	4.1e-28	1.02e-26	Up
	CL857.Contig4_All	succinate dehydrogenase [ubiquinone] flavoprotein subunit, mitochondrial-like	1.1481	6.24e-12	6.55e-11	Up
	Unigene11271_All	cleavage and polyadenylation specificity factor subunit 1	1.08333	1.96e-09	1.65e-08	Up
	Unigene1272_All	malate dehydrogenase	1.07926	2.98e-12	3.21e-11	Up
	CL1487.Contig1_All	adenylate/nucleoside-diphosphate kinase	-2.3704	0	0	Down
	CL857.Contig1_All	succinate dehydrogenase (ubiquinone) flavoprotein subunit	-1.8785	3.38e-08	2.53e-07	Down
	CL857.Contig5_All	succinate dehydrogenase (ubiquinone) flavoprotein subunit	-1.75126	4.15e-24	8.59e-23	Down
